# Supplementary material for: COVID-19 vaccine effectiveness against symptomatic SARS-CoV-2 infection and severe COVID-19 outcomes from Delta AY.4.2: Cohort and test-negative study of 5.4 million individuals in Scotland
Source: PubMed Central journal article supplement (PMC9269984; doi:10.7189/jogh.12.05025), 2022-07-09
Supplement: jogh-12-05025-s001.pdf [file jogh-12-05025-s001.pdf]

## Supplementary Information

**Table S1: Further characteristics of all individuals with a positive RT-PCT test, all who were sequenced, and those with AY.4.2**

| Characteristic                              | Categories             | All positive tests (sequenced & not sequenced) | All positive and sequenced tests | Positive test with AY.4.2 |
|---------------------------------------------|------------------------|------------------------------------------------|----------------------------------|---------------------------|
| Socioeconomic status†                       | 1 (low)                | 62,783 (23.3%)                                 | 10,763 (24.5%)                   | 594 (24.9%)               |
|                                             | 2                      | 57,061 (21.2%)                                 | 9,551 (21.7%)                    | 512 (21.5%)               |
|                                             | 3                      | 48,785 (18.1%)                                 | 7,825 (17.8%)                    | 435 (18.2%)               |
|                                             | 4                      | 49,085 (18.2%)                                 | 7,966 (18.1%)                    | 433 (18.2%)               |
|                                             | 5 (high)               | 50,254 (18.6%)                                 | 7,831 (17.8%)                    | 410 (17.2%)               |
| Urban-rural residence                       | Large Urban Areas      | 100,301 (37.2%)                                | 16,701 (37.7%)                   | 984 (41.1%)               |
|                                             | Other Urban Areas      | 106,565 (39.5%)                                | 17,148 (38.8%)                   | 889 (37.1%)               |
|                                             | Accessible Small Towns | 23,226 (8.6%)                                  | 3,824 (8.6%)                     | 212 (8.8%)                |
|                                             | Remote Small Towns     | 8,657 (3.2%)                                   | 1,453 (3.3%)                     | 74 (3.1%)                 |
|                                             | Accessible Rural       | 21,460 (8.0%)                                  | 3,527 (8.0%)                     | 148 (6.2%)                |
|                                             | Remote Rural           | 7,759 (2.9%)                                   | 1,283 (2.9%)                     | 77 (3.2%)                 |
|                                             | Unknown                | 1,751 (0.6%)                                   | 311 (0.7%)                       | 13 (0.5%)                 |
| Number of coexisting conditions             | 0                      | 166,657 (61.8%)                                | 26,475 (61.1%)                   | 1,420 (60.5%)             |
|                                             | 1                      | 69,533 (25.8%)                                 | 11,230 (25.9%)                   | 628 (26.7%)               |
|                                             | 2                      | 18,901 (7.0%)                                  | 3,380 (7.8%)                     | 191 (8.1%)                |
|                                             | 3                      | 5,719 (2.1%)                                   | 1,229 (2.8%)                     | 65 (2.8%)                 |
|                                             | 4                      | 2,243 (0.8%)                                   | 548 (1.3%)                       | 26 (1.1%)                 |
|                                             | 5+                     | 1,430 (0.5%)                                   | 458 (1.1%)                       | 19 (0.8%)                 |
| Number of RT-PCR tests before specimen date | 0                      | 264,448 (98.0%)                                | 42,977 (99.2%)                   | 2,335 (99.4%)             |
|                                             | 1                      | 35 (0.0%)                                      | 343 (0.8%)                       | 14 (0.6%)                 |
| Average household age                       | Mean (SD)              | 37.7 (16.2)                                    | 38.8 (17.3)                      | 39.5 (17.0)               |
| Size of household                           | 1                      | 61,977 (23.0%)                                 | 10,674 (24.6%)                   | 600 (25.5%)               |
|                                             | 2                      | 64,597 (23.9%)                                 | 10,442 (24.1%)                   | 585 (24.9%)               |
|                                             | 3-5                    | 125,625 (46.6%)                                | 20,018 (46.2%)                   | 1,046 (44.5%)             |
|                                             | 6-10                   | 11,367 (4.2%)                                  | 1,889 (4.4%)                     | 105 (4.5%)                |
|                                             | 11-30                  | 598 (0.2%)                                     | 163 (0.4%)                       | 9 (0.4%)                  |
|                                             | 31-100                 | 376 (0.1%)                                     | 118 (0.3%)                       | 4 (0.2%)                  |
|                                             | 101+                   | 178 (0.1%)                                     | 46 (0.1%)                        | 0 (0.0%)                  |
| Body Mass Index                             | Underweight            | 2,616 (1.0%)                                   | 452 (1.0%)                       | 20 (0.9%)                 |

|  |               |                 |                |               |
|--|---------------|-----------------|----------------|---------------|
|  | Normal weight | 31,616 (11.7%)  | 5,369 (12.4%)  | 266 (11.3%)   |
|  | Overweight    | 187,476 (69.5%) | 30,210 (69.7%) | 1,643 (69.9%) |
|  | Obese         | 42,775 (15.9%)  | 7,289 (16.8%)  | 420 (17.9%)   |

**Table S2: Comorbidities of all individuals with a positive RT-PCT test, all who were sequenced, and those with AY.4.2**

| Characteristic           | Categories | All positive tests (sequenced & not sequenced) | All positive and sequenced tests | Positive test with AY.4.2 |
|--------------------------|------------|------------------------------------------------|----------------------------------|---------------------------|
| Atrial fibrillation      | No         | 260,965 (96.8%)                                | 42,519 (98.2%)                   | 2,314 (98.5%)             |
|                          | Yes        | 3,518 (1.3%)                                   | 801 (1.8%)                       | 35 (1.5%)                 |
| Asthma                   | No         | 223,949 (83.0%)                                | 36,642 (84.6%)                   | 1,978 (84.2%)             |
|                          | Yes        | 40,534 (15.0%)                                 | 6,678 (15.4%)                    | 371 (15.8%)               |
| Blood cancer             | No         | 263,589 (97.7%)                                | 43,124 (99.5%)                   | 2,337 (99.5%)             |
|                          | Yes        | 894 (0.3%)                                     | 196 (0.5%)                       | 12 (0.5%)                 |
| Heart failure            | No         | 262880 (97.5%)                                 | 42,929 (99.1%)                   | 2332 (99.3%)              |
|                          | Yes        | 1603 (0.6%)                                    | 391 (0.9%)                       | 17 (0.7%)                 |
| Cerebral palsy           | No         | 264211 (98.0%)                                 | 43,274 (99.9%)                   | 2,348 (100.0%)            |
|                          | Yes        | 272 (0.1%)                                     | 46 (0.1%)                        | 1 (0.0%)                  |
| Coronary heart disease   | No         | 257,401 (95.4%)                                | 41,820 (96.5%)                   | 2,273 (96.8%)             |
|                          | Yes        | 7,082 (2.6%)                                   | 1,500 (3.5%)                     | 76 (3.2%)                 |
| Cirrhosis                | No         | 263,348 (97.6%)                                | 43,098 (99.5%)                   | 2,338 (99.5%)             |
|                          | Yes        | 1,135 (0.4%)                                   | 222 (0.5%)                       | 11 (0.5%)                 |
| Congenital heart disease | No         | 262,445 (97.3%)                                | 43,022 (99.3%)                   | 2,329 (99.1%)             |
|                          | Yes        | 2,038 (0.8%)                                   | 298 (0.7%)                       | 20 (0.9%)                 |
| COPD                     | No         | 259,839 (96.3%)                                | 42,287 (97.6%)                   | 2,304 (98.1%)             |
|                          | Yes        | 4,644 (1.7%)                                   | 1,033 (2.4%)                     | 45 (1.9%)                 |
| Dementia                 | No         | 263,400 (97.7%)                                | 42,926 (99.1%)                   | 2,328 (99.1%)             |
|                          | Yes        | 1,083 (0.4%)                                   | 394 (0.9%)                       | 21 (0.9%)                 |
| Diabetes 1               | No         | 263,026 (97.5%)                                | 43,092 (99.5%)                   | 2,327 (99.1%)             |
|                          | Yes        | 1457 (0.5%)                                    | 228 (0.55)                       | 22 (0.9%)                 |
| Diabetes 2               | No         | 253,463 (94.0%)                                | 41,177 (95.1%)                   | 2,233 (95.1%)             |
|                          | Yes        | 11,020 (4.1%)                                  | 2,143 (4.9%)                     | 116 (4.9%)                |
| Epilepsy                 | No         | 261,132 (96.8%)                                | 42,716 (98.6%)                   | 2,315 (98.6%)             |
|                          | Yes        | 3,351 (1.2%)                                   | 604 (1.4%)                       | 34 (1.4%)                 |
| Fracture                 | No         | 253,607 (94.0%)                                | 41,375 (95.5%)                   | 2,245 (95.6%)             |
|                          | Yes        | 10,876 (4.0%)                                  | 1,945 (4.5%)                     | 104 (4.4%)                |
| Neurological disorder    | No         | 263,674 (97.8%)                                | 43,173 (99.7%)                   | 2,343 (99.7%)             |
|                          | Yes        | 809 (0.3%)                                     | 147 (0.3%)                       | 6 (0.3%)                  |
| Parkinson's              | No         | 264,229 (98.0%)                                | 43,255 (99.8%)                   | 2,347 (99.9%)             |
|                          | Yes        | 254 (0.1%)                                     | 65 (0.2%)                        | 2 (0.1%)                  |

|                                                                           |                                          |                  |                 |                |
|---------------------------------------------------------------------------|------------------------------------------|------------------|-----------------|----------------|
| Pulmonary hypertension                                                    | No                                       | 264,171 (97.9%)  | 43,227 (99.8%)  | 2,342 (99.7%)  |
|                                                                           | Yes                                      | 312 (0.1%)       | 93 (0.2%)       | 7 (0.3)        |
| Pulmonary rare                                                            | No                                       | 263,576 (97.7%)  | 43,136 (99.6%)  | 2,340 (99.6%)  |
|                                                                           | Yes                                      | 907 (0.3%)       | 184 (0.4%)      | 9 (0.4%)       |
| Peripheral vascular disease                                               | No                                       | 263,189 (97.6%)  | 43,033 (99.3%)  | 2,338 (99.6%)  |
|                                                                           | Yes                                      | 1,294 (0.5%)     | 287 (0.7%)      | 11 (0.5%)      |
| Rheumatoid arthritis or SLE                                               | No                                       | 262,216 (97.2%)  | 42,934 (99.1%)  | 2,327 (99.1%)  |
|                                                                           | Yes                                      | 2,267 (0.8%)     | 386 (0.9%)      | 22 (0.9%)      |
| Respiratory cancer                                                        | No                                       | 264,128 (97.9%)  | 43,238 (99.8%)  | 2,349 (100.0%) |
|                                                                           | Yes                                      | 355 (0.1%)       | 82 (0.2%)       | 0 (0.0%)       |
| Severe mental illness                                                     | No                                       | 234,956 (87.1%)  | 38,271 (88.3%)  | 2,071 (88.2%)  |
|                                                                           | Yes                                      | 29,527 (10.9%)   | 5,049 (11.7%)   | 278 (11.8%)    |
| Sickle cell disease                                                       | No                                       | 264,317 (98.0%)  | 43,287 (99.9%)  | 2,348 (100.0%) |
|                                                                           | Yes                                      | 166 (0.1%)       | 33 (0.1%)       | 1 (0.0%)       |
| Stroke/TIA                                                                | No                                       | 260,524 (96.6%)  | 42,391 (97.9%)  | 2,308 (98.3%)  |
|                                                                           | Yes                                      | 3,960 (1.5%)     | 929 (2.1%)      | 41 (1.7%)      |
| Thrombosis or pulmonary embolus                                           | No                                       | 261,362 (96.9%)  | 42,676 (98.5%)  | 2,307 (98.2%)  |
|                                                                           | Yes                                      | 3,121 (1.2%)     | 644 (1.5%)      | 42 (1.8%)      |
| Care housing category                                                     | No                                       | 263,763 (97.8%)  | 43,080 (99.4%)  | 2,337 (99.5%)  |
|                                                                           | Yes                                      | 512 (0.2%)       | 202 (0.5%)      | 10 (0.4%)      |
|                                                                           | Homeless                                 | 208 (0.1%)       | 38 (0.1%)       | 2 (0.1%)       |
| Learning disability                                                       | No                                       | 261,258 (96.9%)  | 42,722 (98.6%)  | 2,316 (98.6%)  |
|                                                                           | Yes                                      | 3,173 (1.2%)     | 587 (1.4%)      | 31 (1.3%)      |
| Down's syndrome                                                           | No                                       | 264,431 (100.0%) | 43,309 (100.0%) | 2347 (99.9%)   |
|                                                                           | Yes                                      | 53 (0.0%)        | 11 (0.0%)       | 2 (0.1%)       |
| Kidney disease                                                            | No serious kidney disease                | 259,529 (96.2%)  | 42,110 (97.2%)  | 2,289 (97.4%)  |
|                                                                           | CKD5 without dialysis or transplant      | 4,465 (1.7%)     | 1,060 (2.4%)    | 51 (2.2%)      |
|                                                                           | CKD5 with dialysis in the last 12 months | 212 (0.1%)       | 64 (0.1%)       | 5 (0.2%)       |
|                                                                           | CKD5 with transplant                     | 277 (0.1%)       | 86 (0.2%)       | 4 (0.2%)       |
| Smoking status                                                            | Non-smoker                               | 128,685 (47.7%)  | 20,520 (47.4%)  | 1,139 (48.5%)  |
|                                                                           | Ex-smoker                                | 33,140 (12.3%)   | 5,499 (12.7%)   | 307 (13.1%)    |
|                                                                           | Smoker                                   | 57,684 (21.4%)   | 9,778 (22.6%)   | 516 (22.0%)    |
|                                                                           | Unknown                                  | 44,973 (16.7%)   | 7,523 (17.4%)   | 387 (16.5%)    |
| Blood pressure                                                            | No investigation                         | 64,044 (23.7%)   | 10,509 (24.3%)  | 508 (21.6%)    |
|                                                                           | Low                                      | 4,792 (1.8%)     | 772 (1.8%)      | 45 (1.9%)      |
|                                                                           | Normal                                   | 169,003 (62.7%)  | 27,595 (63.7%)  | 1,545 (65.8%)  |
|                                                                           | High                                     | 22,353 (8.3%)    | 3,702 (8.5%)    | 193 (8.2%)     |
|                                                                           | Very high                                | 4,291 (1.6%)     | 742 (1.7%)      | 58 (2.5%)      |
| † Deprivation status: Quintiles of Scottish Index of Multiple Deprivation |                                          |                  |                 |                |

Comorbidities are those used as predictors in the QCOVID algorithm. Ref: Clift AK, et al. Living risk prediction algorithm (QCOVID) for risk of hospital admission and mortality from coronavirus 19 in adults: national derivation and validation cohort study. *BMJ* 2020;371:m3731.

**Table S3: Vaccine effectiveness against symptomatic SARS-CoV-2 infection caused by AY.4.2 stratified by vaccine type**

| Vaccine type    | Vaccine status                          | Number of tests | Number of positive tests | Odds ratio (95% CI) | Vaccine effectiveness (95% CI) |
|-----------------|-----------------------------------------|-----------------|--------------------------|---------------------|--------------------------------|
| ChAdOx1 nCoV-19 | Unvaccinated                            | 7,723           | 44                       | Reference           | Reference                      |
|                 | One vaccine dose                        | 6,391           | 41                       | 0.71<br>(0.46-1.11) | 28.7<br>(-10.9-54.2)           |
|                 | Two vaccine doses 0-13 days before test | 2,272           | <5                       | 0.17<br>(0.04-0.69) | 83.4<br>(31.1-96.0)            |
|                 | Two vaccine doses ≥14 days before test  | 77,905          | 683                      | 0.46<br>(0.32-0.64) | 54.5<br>(35.7-67.8)            |
| mRNA-1273       | Unvaccinated                            | 7,723           | 44                       | Reference           | Reference                      |
|                 | One vaccine dose                        | 5,875           | 38                       | 0.61<br>(0.39-0.95) | 39.5<br>(4.9-61.5)             |
|                 | Two vaccine doses 0-13 days before test | 1,507           | 7                        | 0.30<br>(0.13-0.67) | 70.1<br>(32.8-86.7)            |
|                 | Two vaccine doses ≥14 days before test  | 6,436           | 8                        | 0.06<br>(0.03-0.14) | 93.7<br>(86.4-97.1)            |
| BNT162b2        | Unvaccinated                            | 7,723           | 44                       | Reference           | Reference                      |
|                 | One vaccine dose                        | 22,935          | 128                      | 0.61<br>(0.43-0.88) | 38.8<br>(12.5-57.2)            |
|                 | Two vaccine doses 0-13 days before test | 5,381           | 37                       | 0.50<br>(0.31-0.79) | 50.2<br>(21.1-68.6)            |
|                 | Two vaccine doses ≥14 days before test  | 73,771          | 301                      | 0.21<br>(0.15-0.30) | 78.7<br>(69.9-85.0)            |

In the cohort analysis, the hazard ratio (HR) for COVID-19 hospitalisation or death was 1.77 (1.02-3.07) for AY4.2 compared to delta in those who were unvaccinated.

**Table S4: Hazard ratios and 95% confident intervals (CI) for COVID-19 emergency hospital admission or death from community testing for all categorical variables in the Cox proportional hazards model**

| Population characteristics                                        |        | Number of person-years | Number of events | Hazard Ratios (95% CI) |
|-------------------------------------------------------------------|--------|------------------------|------------------|------------------------|
| Sex                                                               |        |                        |                  |                        |
| Female                                                            |        | 1,431                  | 296              | Reference              |
| Male                                                              |        | 1,387                  | 307              | 1.12 (0.95-1.32)       |
| Socioeconomic status <sup>†</sup>                                 |        |                        |                  |                        |
| 1 (most deprived)                                                 |        | 658                    | 167              | Reference              |
| 2                                                                 |        | 598                    | 158              | 1.13 (0.90-1.41)       |
| 3                                                                 |        | 491                    | 102              | 0.94 (0.73-1.21)       |
| 4                                                                 |        | 521                    | 108              | 1.02 (0.79-1.31)       |
| 5 (least deprived)                                                |        | 532                    | 66               | 0.64 (0.48-0.86)       |
| Number of coexisting conditions                                   |        |                        |                  |                        |
| No at-risk condition                                              |        | 1,800                  | 226              | Reference              |
| One condition                                                     |        | 716                    | 174              | 1.74 (1.43-2.14)       |
| Two conditions                                                    |        | 179                    | 89               | 2.69 (2.07-3.49)       |
| Three conditions                                                  |        | 45                     | 55               | 4.49 (3.22-6.25)       |
| Four conditions                                                   |        | 13                     | 20               | 4.72 (2.89-7.70)       |
| Five or more conditions                                           |        | 7                      | 26               | 8.48 (5.35-13.42)      |
| Vaccination status by variant                                     |        |                        |                  |                        |
| Hazard ratios with respect to unvaccinated with delta             |        |                        |                  |                        |
| Unvaccinated                                                      | AY.4.2 | 28                     | 14               | 1.77 (1.02-3.07)       |
|                                                                   | Other  | 16                     | <5               | 1.27 (0.46-3.49)       |
| Hazard ratios with respect to unvaccinated with indicated variant |        |                        |                  |                        |
|                                                                   | Delta  | 190                    | 18               | 0.42 (0.25-0.69)       |

|                                                                           |        |       |     |                  |
|---------------------------------------------------------------------------|--------|-------|-----|------------------|
| One vaccine dose 0-27 days before test                                    | AY.4.2 | 3     | 0   | -                |
|                                                                           | Other  | 5     | <1  | 0.56 (0.06-5.01) |
| One vaccine dose $\geq$ 28 days before test                               | Delta  | 354   | 44  | 0.35 (0.25-0.49) |
|                                                                           | AY.4.2 | 16    | <5  | 0.22 (0.05-0.98) |
|                                                                           | Other  | 3     | 0   | -                |
| Two vaccine doses 0-27 days before test                                   | Delta  | 155   | 14  | 0.20 (0.11-0.35) |
|                                                                           | AY.4.2 | 7     | 0   | -                |
|                                                                           | Other  | 2     | 0   | -                |
| Two vaccine doses $\geq$ 28 days before test                              | Delta  | 1,176 | 300 | 0.21 (0.16-0.26) |
|                                                                           | AY.4.2 | 86    | 23  | 0.13 (0.06-0.25) |
|                                                                           | Other  | 3     | <5  | 0.19 (0.02-1.73) |
| † Deprivation status: Quintiles of Scottish Index of Multiple Deprivation |        |       |     |                  |

**Figure S1: Hazard ratios for COVID-19 emergency hospital admission or death from community testing by age**

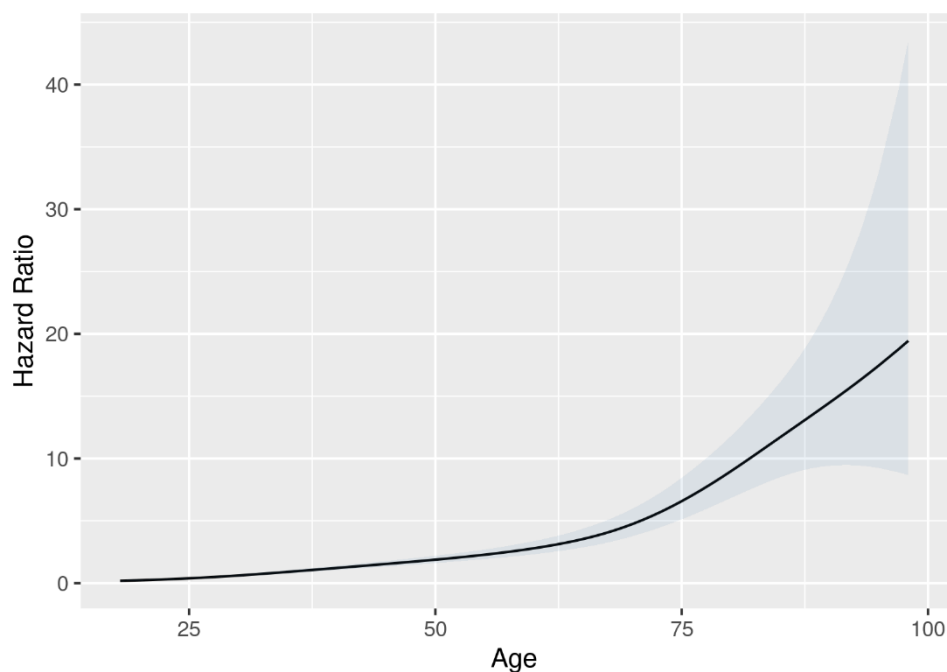

**Table S5: STROBE and RECORD statements**

|                           | Item No. | STROBE items                                                                                                                                                                               | Location in manuscript where items are reported                                                                                                                                                                                        | RECORD items                                                                                                                                                                                                                                                                                                                                                                                                                                | Location in manuscript where items are reported                                                                                                                                                        |
|---------------------------|----------|--------------------------------------------------------------------------------------------------------------------------------------------------------------------------------------------|----------------------------------------------------------------------------------------------------------------------------------------------------------------------------------------------------------------------------------------|---------------------------------------------------------------------------------------------------------------------------------------------------------------------------------------------------------------------------------------------------------------------------------------------------------------------------------------------------------------------------------------------------------------------------------------------|--------------------------------------------------------------------------------------------------------------------------------------------------------------------------------------------------------|
| <b>Title and abstract</b> |          |                                                                                                                                                                                            |                                                                                                                                                                                                                                        |                                                                                                                                                                                                                                                                                                                                                                                                                                             |                                                                                                                                                                                                        |
|                           | 1        | (a) Indicate the study's design with a commonly used term in the title or the abstract (b) Provide in the abstract an informative and balanced summary of what was done and what was found | (a) Title: "COVID-19 vaccine effectiveness against symptomatic SARS-CoV-2 infection and severe COVID-19 outcomes from Delta AY.4.2: Cohort and test-negative study of 5.4 million individuals in Scotland"<br><br>(b) Abstract, page 2 | RECORD 1.1: The type of data used should be specified in the title or abstract. When possible, the name of the databases used should be included.<br><br>RECORD 1.2: If applicable, the geographic region and timeframe within which the study took place should be reported in the title or abstract.<br><br>RECORD 1.3: If linkage between databases was conducted for the study, this should be clearly stated in the title or abstract. | Title: "COVID-19 vaccine effectiveness against symptomatic SARS-CoV-2 infection and severe COVID-19 outcomes from Delta AY.4.2: Cohort and test-negative study of 5.4 million individuals in Scotland" |
| <b>Introduction</b>       |          |                                                                                                                                                                                            |                                                                                                                                                                                                                                        |                                                                                                                                                                                                                                                                                                                                                                                                                                             |                                                                                                                                                                                                        |
| Background rationale      | 2        | Explain the scientific background and rationale for the investigation being reported                                                                                                       |                                                                                                                                                                                                                                        |                                                                                                                                                                                                                                                                                                                                                                                                                                             | Page 3, Introduction                                                                                                                                                                                   |
| Objectives                | 3        | State specific objectives, including any                                                                                                                                                   |                                                                                                                                                                                                                                        |                                                                                                                                                                                                                                                                                                                                                                                                                                             | Page 3, Introduction                                                                                                                                                                                   |

|                |   | prespecified hypotheses                                                                                                         |  |  |                                                                                                                                                                                                                                                                                                                                                                                      |
|----------------|---|---------------------------------------------------------------------------------------------------------------------------------|--|--|--------------------------------------------------------------------------------------------------------------------------------------------------------------------------------------------------------------------------------------------------------------------------------------------------------------------------------------------------------------------------------------|
| <b>Methods</b> |   |                                                                                                                                 |  |  |                                                                                                                                                                                                                                                                                                                                                                                      |
| Study Design   | 4 | Present key elements of study design early in the paper                                                                         |  |  | Page 3, Methods<br>“We used the EAVE II platform to undertake a TND and cohort analysis of all individuals in Scotland who tested positive for SARS-CoV-2 in the community from 8 June – 25 October 2021, to describe the demographic profile of COVID-19 cases, and to investigate the risk of symptomatic SARS-CoV-2 infection and COVID-19 emergency hospital admission or death. |
| Setting        | 5 | Describe the setting, locations, and relevant dates, including periods of recruitment, exposure, follow-up, and data collection |  |  | Page 3, Methods<br>“We used the EAVE II platform to undertake a TND and cohort analysis of all individuals in Scotland who tested positive for SARS-CoV-2 in the community from 8 June – 25 October 2021, to describe the demographic profile of COVID-                                                                                                                              |



|              |   |                                                                                                                                                                                                                                                                                                                                                                                                                                                                                                                                                                                                                                                                                 |  |                                                                                                                                                                                                                                                                                                                                                                                                                                                                                                                                                                                                                                                                                                      |                                                                                                                                                                                                                                                                                                                                                               |
|--------------|---|---------------------------------------------------------------------------------------------------------------------------------------------------------------------------------------------------------------------------------------------------------------------------------------------------------------------------------------------------------------------------------------------------------------------------------------------------------------------------------------------------------------------------------------------------------------------------------------------------------------------------------------------------------------------------------|--|------------------------------------------------------------------------------------------------------------------------------------------------------------------------------------------------------------------------------------------------------------------------------------------------------------------------------------------------------------------------------------------------------------------------------------------------------------------------------------------------------------------------------------------------------------------------------------------------------------------------------------------------------------------------------------------------------|---------------------------------------------------------------------------------------------------------------------------------------------------------------------------------------------------------------------------------------------------------------------------------------------------------------------------------------------------------------|
|              |   |                                                                                                                                                                                                                                                                                                                                                                                                                                                                                                                                                                                                                                                                                 |  |                                                                                                                                                                                                                                                                                                                                                                                                                                                                                                                                                                                                                                                                                                      | 19 cases, and to investigate the risk of symptomatic SARS-CoV-2 infection and COVID-19 emergency hospital admission or death.                                                                                                                                                                                                                                 |
| Participants | 6 | <p><i>(a) Cohort study</i> - Give the eligibility criteria, and the sources and methods of selection of participants. Describe methods of follow-up</p> <p><i>Case-control study</i> - Give the eligibility criteria, and the sources and methods of case ascertainment and control selection. Give the rationale for the choice of cases and controls</p> <p><i>Cross-sectional study</i> - Give the eligibility criteria, and the sources and methods of selection of participants</p> <p><i>(b) Cohort study</i> - For matched studies, give matching criteria and number of exposed and unexposed</p> <p><i>Case-control study</i> - For matched studies, give matching</p> |  | <p>RECORD 6.1: The methods of study population selection (such as codes or algorithms used to identify subjects) should be listed in detail. If this is not possible, an explanation should be provided.</p> <p>RECORD 6.2: Any validation studies of the codes or algorithms used to select the population should be referenced. If validation was conducted for this study and not published elsewhere, detailed methods and results should be provided.</p> <p>RECORD 6.3: If the study involved linkage of databases, consider use of a flow diagram or other graphical display to demonstrate the data linkage process, including the number of individuals with linked data at each stage.</p> | Page 4, Methods: "Individuals entered the TND and cohort studies at the date of specimen collection for a positive test that was virally sequenced, and were followed up until the occurrence of the outcome of interest (i.e., symptomatic SARS-CoV-2 infection, COVID-19 emergency hospital admission or death) or the end of the study (25 October 2021)." |

|                           |   |                                                                                                                                                                                      |  |                                                                                                                                                                                                                 |                                                                                                                                                                                                                                                                                                                                                                                                                                                                                            |
|---------------------------|---|--------------------------------------------------------------------------------------------------------------------------------------------------------------------------------------|--|-----------------------------------------------------------------------------------------------------------------------------------------------------------------------------------------------------------------|--------------------------------------------------------------------------------------------------------------------------------------------------------------------------------------------------------------------------------------------------------------------------------------------------------------------------------------------------------------------------------------------------------------------------------------------------------------------------------------------|
|                           |   | criteria and the number of controls per case                                                                                                                                         |  |                                                                                                                                                                                                                 |                                                                                                                                                                                                                                                                                                                                                                                                                                                                                            |
| Variables                 | 7 | Clearly define all outcomes, exposures, predictors, potential confounders, and effect modifiers. Give diagnostic criteria, if applicable.                                            |  | RECORD 7.1: A complete list of codes and algorithms used to classify exposures, outcomes, confounders, and effect modifiers should be provided. If these cannot be reported, an explanation should be provided. | Page 4-5. Outcomes and Statistical analysis sections.                                                                                                                                                                                                                                                                                                                                                                                                                                      |
| Data sources/ measurement | 8 | For each variable of interest, give sources of data and details of methods of assessment (measurement). Describe comparability of assessment methods if there is more than one group |  |                                                                                                                                                                                                                 | Page 3, Methods: “Early Pandemic Evaluation and Enhanced Surveillance (EAVE II) is a COVID-19 surveillance platform that comprises of linked primary care, secondary care, mortality, virological-sequencing and COVID-19 testing data covering 5.4 million (~99% population coverage) people in Scotland. EAVE II has been used to track and forecast the epidemiology of COVID-19, inform deliberations on risk stratification, and investigate vaccine effectiveness and safety.[4-13]” |

|                        |    |                                                                                                                                                                                                                                                                                                                                                                                                                                                                                                                                                        |  |  |                                |
|------------------------|----|--------------------------------------------------------------------------------------------------------------------------------------------------------------------------------------------------------------------------------------------------------------------------------------------------------------------------------------------------------------------------------------------------------------------------------------------------------------------------------------------------------------------------------------------------------|--|--|--------------------------------|
| Bias                   | 9  | Describe any efforts to address potential sources of bias                                                                                                                                                                                                                                                                                                                                                                                                                                                                                              |  |  | Page 4-5, Statistical analysis |
| Study size             | 10 | Explain how the study size was arrived at                                                                                                                                                                                                                                                                                                                                                                                                                                                                                                              |  |  | Population-wide study – NA.    |
| Quantitative variables | 11 | Explain how quantitative variables were handled in the analyses. If applicable, describe which groupings were chosen, and why                                                                                                                                                                                                                                                                                                                                                                                                                          |  |  | Page 4-5, Statistical analysis |
| Statistical methods    | 12 | <p>(a) Describe all statistical methods, including those used to control for confounding</p> <p>(b) Describe any methods used to examine subgroups and interactions</p> <p>(c) Explain how missing data were addressed</p> <p>(d) <i>Cohort study</i> - If applicable, explain how loss to follow-up was addressed</p> <p><i>Case-control study</i> - If applicable, explain how matching of cases and controls was addressed</p> <p><i>Cross-sectional study</i> - If applicable, describe analytical methods taking account of sampling strategy</p> |  |  | Page 4-5, Statistical analysis |

|                                  |  |                                       |  |                                                                                                                                                                                                                                                                     |                                                                                                                                                                                                                                                                                                                                                                                                                                                                  |
|----------------------------------|--|---------------------------------------|--|---------------------------------------------------------------------------------------------------------------------------------------------------------------------------------------------------------------------------------------------------------------------|------------------------------------------------------------------------------------------------------------------------------------------------------------------------------------------------------------------------------------------------------------------------------------------------------------------------------------------------------------------------------------------------------------------------------------------------------------------|
|                                  |  | (e) Describe any sensitivity analyses |  |                                                                                                                                                                                                                                                                     |                                                                                                                                                                                                                                                                                                                                                                                                                                                                  |
| Data access and cleaning methods |  | ..                                    |  | <p>RECORD 12.1: Authors should describe the extent to which the investigators had access to the database population used to create the study population.</p> <p>RECORD 12.2: Authors should provide information on the data cleaning methods used in the study.</p> |                                                                                                                                                                                                                                                                                                                                                                                                                                                                  |
| Linkage                          |  | ..                                    |  | <p>RECORD 12.3: State whether the study included person-level, institutional-level, or other data linkage across two or more databases. The methods of linkage and methods of linkage quality evaluation should be provided.</p>                                    | <p>Page 3, Methods: “Early Pandemic Evaluation and Enhanced Surveillance (EAVE II) is a COVID-19 surveillance platform that comprises of linked primary care, secondary care, mortality, virological-sequencing and COVID-19 testing data covering 5.4 million (~99% population coverage) people in Scotland. EAVE II has been used to track and forecast the epidemiology of COVID-19, inform deliberations on risk stratification, and investigate vaccine</p> |

|                      |    |                                                                                                                                                                                                                                                                                                                                                 |  |                                                                                                                                                                                                                                                                                                                    |                                  |
|----------------------|----|-------------------------------------------------------------------------------------------------------------------------------------------------------------------------------------------------------------------------------------------------------------------------------------------------------------------------------------------------|--|--------------------------------------------------------------------------------------------------------------------------------------------------------------------------------------------------------------------------------------------------------------------------------------------------------------------|----------------------------------|
|                      |    |                                                                                                                                                                                                                                                                                                                                                 |  |                                                                                                                                                                                                                                                                                                                    | effectiveness and safety.[4-13]” |
| <b>Results</b>       |    |                                                                                                                                                                                                                                                                                                                                                 |  |                                                                                                                                                                                                                                                                                                                    |                                  |
| Participant<br>s     | 13 | (a) Report the numbers of individuals at each stage of the study ( <i>e.g.</i> , numbers potentially eligible, examined for eligibility, confirmed eligible, included in the study, completing follow-up, and analysed)<br>(b) Give reasons for non-participation at each stage.<br>(c) Consider use of a flow diagram                          |  | RECORD 13.1: Describe in detail the selection of the persons included in the study ( <i>i.e.</i> , study population selection) including filtering based on data quality, data availability and linkage. The selection of included persons can be described in the text and/or by means of the study flow diagram. | Table 1, Tables S1, Table S2     |
| Descriptiv<br>e data | 14 | (a) Give characteristics of study participants ( <i>e.g.</i> , demographic, clinical, social) and information on exposures and potential confounders<br>(b) Indicate the number of participants with missing data for each variable of interest<br>(c) <i>Cohort study</i> - summarise follow-up time ( <i>e.g.</i> , average and total amount) |  |                                                                                                                                                                                                                                                                                                                    | Table 1, Tables S1, Table S2     |
| Outcome<br>data      | 15 | <i>Cohort study</i> - Report numbers of outcome events or summary                                                                                                                                                                                                                                                                               |  |                                                                                                                                                                                                                                                                                                                    | Table 2                          |

|                |    |                                                                                                                                                                                                                                                                                                                                                                                                                                |  |  |         |
|----------------|----|--------------------------------------------------------------------------------------------------------------------------------------------------------------------------------------------------------------------------------------------------------------------------------------------------------------------------------------------------------------------------------------------------------------------------------|--|--|---------|
|                |    | <p>measures over time</p> <p><i>Case-control study</i> - Report numbers in each exposure category, or summary measures of exposure</p> <p><i>Cross-sectional study</i> - Report numbers of outcome events or summary measures</p>                                                                                                                                                                                              |  |  |         |
| Main results   | 16 | <p>(a) Give unadjusted estimates and, if applicable, confounder-adjusted estimates and their precision (e.g., 95% confidence interval). Make clear which confounders were adjusted for and why they were included</p> <p>(b) Report category boundaries when continuous variables were categorized</p> <p>(c) If relevant, consider translating estimates of relative risk into absolute risk for a meaningful time period</p> |  |  | Table 2 |
| Other analyses | 17 | Report other analyses done— e.g., analyses of subgroups and interactions, and                                                                                                                                                                                                                                                                                                                                                  |  |  |         |

|                   |    |                                                                                                                                                            |  |                                                                                                                                                                                                                                                                                                          |                                                                                                                                                                                                                                                                                                                                                                                                                                                                |
|-------------------|----|------------------------------------------------------------------------------------------------------------------------------------------------------------|--|----------------------------------------------------------------------------------------------------------------------------------------------------------------------------------------------------------------------------------------------------------------------------------------------------------|----------------------------------------------------------------------------------------------------------------------------------------------------------------------------------------------------------------------------------------------------------------------------------------------------------------------------------------------------------------------------------------------------------------------------------------------------------------|
|                   |    | sensitivity analyses                                                                                                                                       |  |                                                                                                                                                                                                                                                                                                          |                                                                                                                                                                                                                                                                                                                                                                                                                                                                |
| <b>Discussion</b> |    |                                                                                                                                                            |  |                                                                                                                                                                                                                                                                                                          |                                                                                                                                                                                                                                                                                                                                                                                                                                                                |
| Key results       | 18 | Summarise key results with reference to study objectives                                                                                                   |  |                                                                                                                                                                                                                                                                                                          | Page 11 Discussion: "In this study of vaccine effectiveness against symptomatic COVID-19 infection and COVID-19 hospitalisation/death with the AY.4.2 variant we found that amongst unvaccinated individuals, AY.4.2 was associated with an increased risk of severe COVID-19 outcomes relative to the Delta variant HR 1.77 (95% CI 1.02-3.06). We also found high levels of VE against infection, and a composite outcome of COVID hospitalisation or death" |
| Limitations       | 19 | Discuss limitations of the study, taking into account sources of potential bias or imprecision. Discuss both direction and magnitude of any potential bias |  | RECORD 19.1: Discuss the implications of using data that were not created or collected to answer the specific research question(s). Include discussion of misclassification bias, unmeasured confounding, missing data, and changing eligibility over time, as they pertain to the study being reported. | Page 12 Discussion: "However, this study also had some limitations. One concern is that only 16% of positive RT-PCR tests in the study period were sequenced, which raises the possibility of a sample selection bias. In order to examine this, we looked at the marginal distribution of a                                                                                                                                                                   |

|                |    |                                                                                                                                                                            |  |  |                                                                                                                                                                                                                                                                                                                                                                                                                                                                                                          |
|----------------|----|----------------------------------------------------------------------------------------------------------------------------------------------------------------------------|--|--|----------------------------------------------------------------------------------------------------------------------------------------------------------------------------------------------------------------------------------------------------------------------------------------------------------------------------------------------------------------------------------------------------------------------------------------------------------------------------------------------------------|
|                |    |                                                                                                                                                                            |  |  | <p>number of demographic and clinical variables amongst all who tested positive, all who tested positive and were virally sequenced, and all who tested positive, were virally sequenced, and had AY.4.2. We did not find any large disparities between these groups. There were low numbers of people who had a COVID-19 hospitalisation/death and that were virally sequenced during the study period. This precluded us from estimating VE against serious COVID-19 outcomes in some categories.”</p> |
| Interpretation | 20 | Give a cautious overall interpretation of results considering objectives, limitations, multiplicity of analyses, results from similar studies, and other relevant evidence |  |  | <p>Page 12 Discussion: “In conclusion, we found that unvaccinated individuals were more susceptible to COVID-19 hospitalisation/death if infected with AY.4.2 compared to the Delta variant, and high levels of VE against both infection and serious COVID-19 outcomes for the AY.4.2 variant. “</p>                                                                                                                                                                                                    |



|                                                           |    |                                                                                                                                                               |  |                                                                                                                                                          |                                                       |
|-----------------------------------------------------------|----|---------------------------------------------------------------------------------------------------------------------------------------------------------------|--|----------------------------------------------------------------------------------------------------------------------------------------------------------|-------------------------------------------------------|
|                                                           |    |                                                                                                                                                               |  |                                                                                                                                                          |                                                       |
| Generalisability                                          | 21 | Discuss the generalisability (external validity) of the study results                                                                                         |  |                                                                                                                                                          | Page 11 Discussion:                                   |
| <b>Other Information</b>                                  |    |                                                                                                                                                               |  |                                                                                                                                                          |                                                       |
| Funding                                                   | 22 | Give the source of funding and the role of the funders for the present study and, if applicable, for the original study on which the present article is based |  |                                                                                                                                                          | Page 2, Funding<br>Page 5, Role of the funding source |
| Accessibility of protocol, raw data, and programming code |    | ..                                                                                                                                                            |  | RECORD 22.1: Authors should provide information on how to access any supplemental information such as the study protocol, raw data, or programming code. | Page 6, Data sharing                                  |
